# Supplementary material for: Relationship between Heavy Metal Exposure and Bone Mineral Density in Korean Adult
Source: PubMed Central journal article supplement — J Bone Metab. 2016 Nov 30;23(4):223–31. doi: 10.11005/jbm.2016.23.4.223 (PMC5153379; doi:10.11005/jbm.2016.23.4.223), 2016-11-30
Supplement: jbm-23-223-s001.pdf [file jbm-23-223-s001.pdf]

**Supplementary Table 1.** Demographic characteristics according to level of bone mineral density

| Variables                                     | Normal<br>(n=883) | Osteopenia or<br>osteoporosis<br>(n=1,546) | P-value             |
|-----------------------------------------------|-------------------|--------------------------------------------|---------------------|
| Age (yr)                                      |                   |                                            | <0.001              |
| <40                                           | 414 (46.9)        | 574 (37.1)                                 |                     |
| 40-60                                         | 322 (36.5)        | 651 (42.1)                                 |                     |
| ≥60                                           | 147 (16.6)        | 321 (20.8)                                 |                     |
| Sex                                           |                   |                                            | 0.002               |
| Male                                          | 470 (53.2)        | 759 (49.1)                                 |                     |
| Female in menstruation                        | 271 (30.7)        | 446 (28.8)                                 |                     |
| Female in menopause                           | 142 (16.1)        | 341 (22.1)                                 |                     |
| Body mass index (kg/m <sup>2</sup> )          |                   |                                            | 0.206               |
| <18.5                                         | 51 (5.8)          | 72 (4.7)                                   |                     |
| 18.5-22.9                                     | 354 (40.1)        | 645 (41.7)                                 |                     |
| 23.0-27.4                                     | 361 (40.9)        | 659 (42.6)                                 |                     |
| ≥27.5                                         | 117 (13.3)        | 170 (11.0)                                 |                     |
| Smoking                                       |                   |                                            | 0.799               |
| Never                                         | 455 (51.5)        | 816 (52.8)                                 |                     |
| Past                                          | 109 (12.3)        | 180 (11.6)                                 |                     |
| Current                                       | 319 (36.1)        | 550 (35.6)                                 |                     |
| Smoking amount in current smokers (piece/day) | 14.3±7.1          | 15.0±8.0                                   | 0.169 <sup>a)</sup> |
| Alcohol drinking                              |                   |                                            | 0.119               |
| None                                          | 176 (19.9)        | 364 (23.5)                                 |                     |
| Occasional (≤1/week)                          | 499 (56.5)        | 837 (54.1)                                 |                     |
| Frequent (≥2/week)                            | 208 (23.6)        | 345 (22.3)                                 |                     |
| Living area                                   |                   |                                            | <0.001              |
| Rural                                         | 108 (12.2)        | 303 (19.6)                                 |                     |
| Urban                                         | 775 (87.8)        | 1243 (80.4)                                |                     |
| Educational level                             |                   |                                            | <0.001              |
| <High school                                  | 217 (24.6)        | 485 (31.4)                                 |                     |
| High school                                   | 327 (37.0)        | 579 (37.5)                                 |                     |
| ≥College                                      | 339 (38.4)        | 482 (31.2)                                 |                     |
| Occupation                                    |                   |                                            | 0.092               |
| White color                                   | 354 (40.1)        | 551 (35.6)                                 |                     |
| Blue color                                    | 214 (24.2)        | 406 (26.3)                                 |                     |
| None                                          | 315 (35.7)        | 589 (38.1)                                 |                     |
| Family income                                 |                   |                                            | 0.224               |
| Low                                           | 120 (13.6)        | 230 (14.9)                                 |                     |
| Middle-low                                    | 223 (25.3)        | 430 (27.8)                                 |                     |
| Middle-high                                   | 272 (30.8)        | 423 (27.4)                                 |                     |
| High                                          | 268 (30.4)        | 463 (29.9)                                 |                     |

The data is presented as mean ± standard deviation for continuous variables and frequency (%) for categorical variables.

P-values were calculated by chi-square test.

<sup>a)</sup>P-value was calculated by Jonckheere-Terpstra's trend test.
